# Supplementary material
Source: publisher site journal article supplement (https://www.spandidos-publications.com/294/downloadSupplementary)
Supplement: Supplementary file 1 [file downloadSupplementary]

Figure S1. Flowchart of patient enrollment.

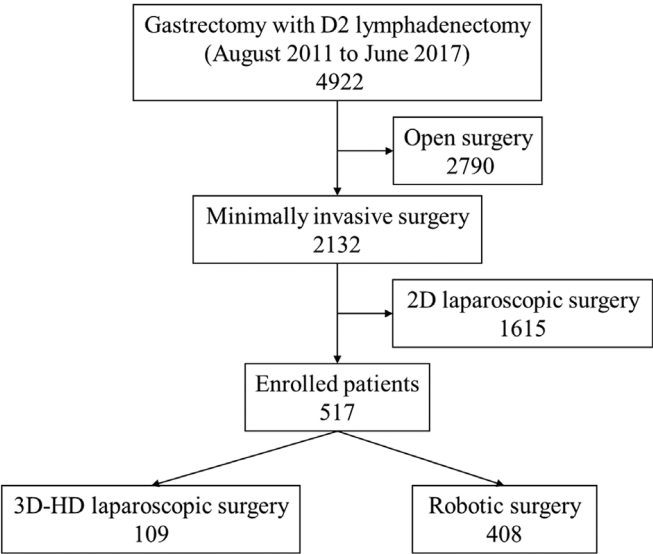

Table SI. Comparison of the operative time between the robotic and 3D-HD laparoscopic gastrectomy groups before and after OT stabilization in all patients.

| Phase                | Robotic    | 3D-HD<br>laparoscopic | P-value |
|----------------------|------------|-----------------------|---------|
| Before stabilization | 233.8±78.8 | 183.6±55.9            | 0.216   |
| After stabilization  | 207.2±58.3 | 237.4±68.4            | 0.125   |

In all patients, the cut-off cases for robotic and 3D-HD laparoscopic gastrectomy before and after the OT stabilized were Cases 21 and 19, respectively. 3D-HD, 3-dimensional high-definition; OT, operative time.

Table SII. Comparison of postoperative days to flatus between the robotic and 3D-HD laparoscopic gastrectomy groups before and after stabilization of the operative time in patients treated by LC, as well as in different phases.

| Phase             | Robotic | 3D-HD<br>laparoscopic | P-value |
|-------------------|---------|-----------------------|---------|
| Phase I           | 3.8±2.0 | 3.2±1.2               | 0.038   |
| Phases II and III | 2.9±0.9 | 3.7±1.6               | <0.001  |
| Phase II          | 3.0±1.1 | 3.6±1.5               | 0.008   |
| Phase III         | 2.9±0.8 | 3.8±1.7               | 0.013   |
| Total             | 3.2±1.4 | 3.6±1.5               | 0.118   |

3D-HD, three-dimensional high-definition.
